# Supplementary material for: Dengue Virus RNA Structure Specialization Facilitates Host Adaptation
Source: PLoS Pathog. 2015 Jan 30;11(1):e1004604. doi: 10.1371/journal.ppat.1004604 (PMC4311971; doi:10.1371/journal.ppat.1004604)
Supplement: S1 Table — (XLS) [file ppat.1004604.s006.xls]

## Sheet: Hoja1
DENV1	AF298807.1	ICoast	Abidjan/98/1-465
DENV1	AY732476.1	Thai	0442/80	genotype5
DENV1	AF514883.2	Parag	259/00/1-465
DENV1	AY206457.3	Argen	293/00/genotype5
DENV1	AF311956.1	Braz	111/97/1-465
DENV1	AF311958.1	Braz	233/97/1-465
DENV1	EF122232.1	FrenchGuiana	NAa5c	2006/1-465
DENV1	AF513110.1	Braz	MR	01/1-465
DENV1	AF226685.2	Braz/90/1-465
DENV1	GQ868539.1	MX	BID-V3760/08	Genotype5	mosq
DENV1	GQ868536.1	MX	BID-V3756/08	mosquito/1-436
DENV1	GU131984.1	MX	BID-V3761/08	mosquito/1-436
DENV1	GQ868537.1	MX	BID-V3758/08	mosquito/1-436
DENV1	EF457905.1	Malaysia	P72-1244/72	Genotype3	sylvatic	monkey
DENV1	AB074760.1	Jap	Mochizuki	43/91/1-465
DENV1	AF298808.1	Djibouti	606/98/1-465
DENV1	AF350498.1	China	GZ/80/1-465
DENV1	AY732478.1	Thai	0323/91	genotype1/1-465
DENV1	AY732481.1	Thai	0081/82/1-465	Genotype1
DENV1	AY732477.1	Thai	0336/91/1-465
DENV1	AY732483.1	Thai	0008/81/1-465
DENV1	AY732480.1	Thai	0097/94/1-465
DENV1	M87512.1	Singapur	S275/90/1-465
DENV1	AB178040.1	Japan	02-20/06	Genotype4
DENV1	AY732482.1	Thai	0049/01/1-465
DENV1	AY732479.1	Thai	0102/01	genotype1/1-465
DENV1	NC	001477.1/1-465
DENV1	AB074761.1	Indo	A88/88	genotype4/1-465
DENV1	AB195673.1	Japan	03-41/03/1-448
DENV1	AB204803.1	Japan	04-27/04	Genotype4
DENV2	EU056811.1	Peru	IQT1950/1995	American
DENV2	AF100468.1	Peru	IQT2913/1995	American
DENV2	AY702040.1	Colombia	I348600	American
DENV2	EU056812.1	PR1328/1973	American
DENV2	AF359579.1	China	FJ11/1999	Cosmopolitan
DENV2	AF169679.1	ThNH36/1993	AsianI
DENV2	DQ181797.1	Th	0078/2001	AsianI
DENV2	NC	1474	Reference	AsianI
DENV2	AF169688.1	ThNH81/1993	AsianI
DENV2	AF169678.1	ThNH29/1993	AsianI
DENV2	AF204177.1	Ch	44/1947	AsianII
DENV2	AF204178.1	Ch	43/1989	AsianII
DENV2	M29095.1	NGC/1994	AsianII
DENV2	AB122022.1	DR	59/2001	Asian/american
DENV2	AF489932.1	BR64022/2002	Asian/american
DENV2	M20558.1	Jamaica	N1409/1983	Asian/american
DENV2	AF208496.1	Martinique	703/1998	Asian/american
DENV2	AY702036.1	CUB	115/1997	Asian/american
DENV2	AY702034.1	CUB13/1997	Asian/american
DENV2	AY702039.1	CUB205/1997	Asian/american
DENV2	AY858036.2	In	TB16i/2004	Cosmopolitan
DENV2	EF051521.1	Ch	Zs01/2001	Cosmopolitan
DENV2	AY858035.2	Indonesia	BA05i/2004	Cosmopolitan
DENV2	AB189122.1	Indonesia	900663/1998	Cosmopolitan
DENV2	AY037116.1	Australia	TSV01/1993	Cosmopolitan
DENV2	EU056810.1	BurkinaFaso	1349/1983	Cosmopolitan
DENV2	GU131843	BurkinaFaso
DENV2	AF309960.1	BurkinaFaso	DakAr6894/1986	mosquito**
DENV2	AF309962.1	Indonesia	P7-863/1969	mosquito**
DENV2	AF309963.1	Indonesia	P8-377/1969	mosquito	aa**
DENV2	AF309964.1	Indonesia	H8-2027/1969	mosquito	aal**
DENV2	EF105379.1	P8-1407	Malaysa/1970	monkey**
DENV2	EF105387.1	Nigeria	IBH11208/1966	Sylvatic	human
DENV2	EF105388.1	Nigeria	IBH11664/1966	Sylvatic	human
DENV2	EU003591.1	Nigeria	IBH11234/1966	Sylvatic	human
DENV2	EF457904.1	Senegal	DakAr75505/1991	alu
DENV2	AF309955.1	BurkinaFaso	DakArA2022/1980	alu
DENV2	AF309957.1	Rep.ofGuinea	PM33974/1981	aaf
DENV2	AF309956.1	BurkinaFaso	DakArA2039/1980	alu**
DENV2	EF105384.1	Senegal	DakArHD10674/1970	Sylvatic	human*
DENV2	EF105385.1	Senegal	DakArD20761/1974	Sylvatic	alu*
DENV2	EF105390.1	Senegal	DakAr141070/1999	Sylvatic	alu*
DENV2	EF105389.1	Senegal	DakAr141069/1999	Sylvatic	alu*
DENV2	EF105383.1	Coted'Ivore	DakArA1247/1980	Sylvatic	ata*
DENV2	EF105381.1	Coted'Ivore	DakAr510/1980	Sylvatic	ata*
DENV2	EF105380.1	Coted'Ivore	DakAr578/1980	Sylvatic	ata
DENV2	EF105382.1	BurkinaFaso	DakAr2039/1980	Sylvatic	alu*
DENV2	EF105386.1	BurkinaFaso	DakArA20202/1980	Sylvatic	aaf*
DENV3	BR73354mosq-2001
DENV3	BR73356mosq-2001
DENV3	M93130.1	Phil	H87/96	genotype1
DENV3	AY676348.1	Thai	1687/98	genotype2
DENV3	BR74886-2002	AY679147.1
DENV3	BR73636mosq-2001
DENV3	BR81200mosq2006
DENV3	NC	001475.2	Genotype3
DENV3	AY099336.1	SriL	1266/00	genotype3
DENV3	AY676349.1	Thai	1283/98	genotype2
DENV3	AY676351.1	Thai	0055/93	genotype2
DENV3	AY676350.1	Thai	0104/93	genotype2
DENV3	AY676353.1	Thai	0007/87	genotype2
DENV3	AY099337.1	Martinique	1243/99	genotype	3
DENV3	AY648961.1
DENV3	AY744677.1	FrenchPolinesia	27643/89	genotype	1
DENV3	AY676352.1	Thai	0010/87	Genotype2
DENV4	EF457906.1	Mal	P75-215/75	Sylvatic
DENV4	AF310152.1	Mal	P73-1120/73	Sylvatic
DENV4	AY618989.1	Thai	0017/97	genotype3
DENV4	AY618988.1	Thai	0476/97	genotype3
DENV4	AY618993.1	Thai	734	0	genotype2
DENV4	NC	002640.1	genotype2
DENV4	AF326573.1	DominicanRep	814669/81	genotype2
DENV4	AY618991.1	Thai	0087/77	genotype1
DENV4	AY618992.1	Thai	0485/01	genotype1
DENV4	AY618990.1	Thai	0348/91	genotype1

## Sheet: Hoja2
	SLs	DBs
Aroa virus group
Aroa
Bussuquara	1	2
Iguape	3	2
Naranjal
Dengue virus group
DENV1	2	2
DENV2	2	2
DENV3	2	2
DENV4	1	2
Kedougou virus	1	1
Japanese encephalitis virus group
Cacipacore virus
Japanese encephalitis virus	3	2
Koutango
Alfuy virus	3	2
Murray Valley encephalitis virus	4	2
St Louis encephalitis virus	3	2
Usutu virus	4	2
Kunjin virus	4	2
West Nile virus	4	2
Yaounde virus	3	2
Kokobera virus group
Kokobera virus
Stratford virus

## Sheet: Hoja3
FLAVIVIRUS GROUP	Virus	GenBank accession	Location	Strain	Year	Genotype	Host
DENGUE VIRUS GROUP	DENV2	EU056811.1	Peru	IQT1950	1995	American*	Human
	DENV2	AF100468.1	Peru	IQT2913	1995	American*	I.U.
	DENV2	AY702040.1	Colombia	I348600	1986	American*	Human
	DENV2	EU056812.1	Puerto Rico	PR1328	1973	American*	Human
	DENV2	AF169679.1	Thailand	ThNH36	1993	AsianII*	Human
	DENV2	DQ181797.1	Thailand	Th0078	2001	AsianII*	I.U.
	DENV2	NC_001474	Thailand	16681	1964	AsianII*	Human
	DENV2	AF169688.1	Thailand	ThNH81	1993	AsianII*	Human
	DENV2	AF169678.1	Thailand	ThNH29	1993	AsianII*	Human
	DENV2	AF204177.1	China	Ch44	1989	AsianI*	Human
	DENV2	AF204178.1	China	Ch43	1987	AsianI*	Human
	DENV2	M29095.1	Papua New Guinea	NGC	1944	AsianI*	Human
	DENV2	AB122022.1	Dominican Republic	DR59	2001	Asian/American*	Human
	DENV2	AF489932.1	Brazil	BR64022	2002	Asian/American*	I.U.
	DENV2	M20558.1	Jamaica	N1409	1983	Asian/American*	I.U.
	DENV2	AF208496.1	Martinique	MART703	1998	Asian/American*	Human
	DENV2	AY702036.1	Cuba	CUB115	1997	Asian/American*	Human
	DENV2	AY702034.1	Cuba	CUB13	1997	Asian/American*	Human
	DENV2	AY702039.1	Cuba	CUB205	1997	Asian/American*	Human
	DENV2	AY858036.2	Indonesia	TB16i	2004	Cosmopolitan*	Human
	DENV2	EF051521.1	China	Zs01	2001	Cosmopolitan*	I.U.
	DENV2	AY858035.2	Indonesia	BA05i	2004	Cosmopolitan*	Human
	DENV2	AB189122.1	Indonesia	900663	1998	Cosmopolitan*	Human
	DENV2	AY037116.1	Australia	Austral/TSV01	1993	Cosmopolitan*	Human
	DENV2	AF359579.1	China	FJ11	1999	Cosmopolitan*	I.U.
	DENV2	EU056810.1	BurkinaFaso	1349	1983	Cosmopolitan*	Human
	DENV2	GU131843.1	BurkinaFaso	BF/BID-V3502	1986	I.U.	Aedes aegypti
	DENV2	AF309960.1	BurkinaFaso	DakAr6894	1986	I.U.	Mosquito
	DENV2	AF309962.1	Indonesia	P7-863	1969	I.U.	Mosquito
	DENV2	AF309963.1	Indonesia	P8-377	1969	I.U.	Aedes aegypti
	DENV2	AF309964.1	Indonesia	H8-2027	1969	I.U.	Aedes albopictus
	DENV2	EF105379.1	Malaysa	P8-1407	1970	Sylvatic*	Monkey
	DENV2	EF105387.1	Nigeria	IBH11208	1966	Sylvatic*	Human
	DENV2	EU003591.1	Nigeria	IBH11234	1966	Sylvatic*	I.U.
	DENV2	EF105388.1	Nigeria	IBH11664	1966	Sylvatic*	Human
	DENV2	EF457904.1	Senegal	DakAr75505	1991	Sylvatic*	Aedes luteocephalus
	DENV2	AF309955.1	BurkinaFaso	DakArA2022	1980	Sylvatic*	Aedes africanus
	DENV2	AF309957.1	Rep.ofGuinea	PM33974	1981	Sylvatic*	Aedes africanus
	DENV2	AF309956.1	BurkinaFaso	DakArA2039	1980	Sylvatic*	Aedes luteocephalus
	DENV2	EF105384.1	Senegal	DakArHD10674	1970	Sylvatic*	Human
	DENV2	EF105385.1	Senegal	DakArD20761	1974	Sylvatic*	Aedes luteocephalus
	DENV2	EF105390.1	Senegal	DakAr141070	1999	Sylvatic*	Aedes luteocephalus
	DENV2	EF105389.1	Senegal	DakAr141069	1999	Sylvatic*	Aedes luteocephalus
	DENV2	EF105383.1	Coted'Ivore	DakArA1247	1980	Sylvatic*	Aedes taylori
	DENV2	EF105381.1	Coted'Ivore	DakAr510	1980	Sylvatic*	Aedes taylori
	DENV2	EF105380.1	Coted'Ivore	DakAr578	1980	Sylvatic*	Aedes taylori
	DENV2	EF105382.1	BurkinaFaso	DakAr2039	1980	Sylvatic*	Aedes luteocephalus
	DENV2	EF105386.1	BurkinaFaso	DakArA2022	1980	Sylvatic*	Aedes africanus
	DENV1	AF298807.1	Coted'Ivore	Abidjan	1998	I.U.	I.U.
	DENV1	AY732476.1	Thailand	ThD1-0442	1980	Genotype5*	I.U.
	DENV1	GQ868539.1	Mexico	BID-V3760	2008	Genotype5*	Aedes aegypti
	DENV1	AF514883.2	Paraguay	259par00	2000	Genotype5*	I.U.
	DENV1	AY206457.3	Argentina	293arg00	2000	Genotype5*	I.U.
	DENV1	AF311956.1	Brazil	BR97/111	1997	Genotype5*	Human
	DENV1	AF311958.1	Brazil	BR97/233	1997	Genotype5*	Human
	DENV1	EF122232.1	French Guiana	FGA/NAa5c	2006	I.U.	I.U.
	DENV1	AF513110.1	Brazil	BR/01-MR	2001	Genotype5*	I.U.
	DENV1	AF226685.2	Brazil	Den1BR	1990	Genotype5*	I.U.
	DENV1	GQ868536.1	Mexico	BID-V3756	2008	Genotype5*	Aedes aegypti
	DENV1	GU131984.1	Mexico	BID-V3761	2008	Genotype5*	Aedes aegypti
	DENV1	GQ868537.1	Mexico	BID-V3758	2008	Genotype5*	Aedes aegypti
	DENV1	EF457905.1	Malaysia	P72-1244	1972	Genotype3*	Monkey
	DENV1	AB074760.1	Japan	Mochizuki	1943	I.U.	I.U.
	DENV1	AF298808.1	Djibouti	IMTSSA/606	1998	I.U.	I.U.
	DENV1	AF350498.1	China	GZ	1980	I.U.	I.U.
	DENV1	AY732478.1	Thailand	ThD1-0323	1991	Genotype1*	Human
	DENV1	AY732481.1	Thailand	ThD1-0081	1982	Genotype1*	Human
	DENV1	AY732477.1	Thailand	ThD1-336	1991	Genotype1*	Human
	DENV1	AY732483.1	Thailand	ThD1-0008	1981	Genotype1*	Human
	DENV1	AY732480.1	Thailand	ThD1-0097	1994	Genotype1*	Human
	DENV1	M87512.1	Singapur	S275	1990	I.U.	I.U.
	DENV1	AB178040.1	Japan	02_20	2006	Genotype4*	Human
	DENV1	AY732482.1	Thailand	ThD1-0049	2001	Genotype4*	Human
	DENV1	AY732479.1	Thailand	ThD1-0102	2001	Genotype4*	Human
	DENV1	NC_001477.1	Reference	45AZ5	1997	Genotype4*	I.U.
	DENV1	AB074761.1	Indonesia	A88	1988	I.U.	I.U.
	DENV1	AB195673.1	Japan	03_41	2003	Genotype4*	Human
	DENV1	AB204803.1	Japan	04_27	2004	Genotype4*	Human
	DENV3	M93130.1	Philippines	H87	1996	Genotype1*	I.U.
	DENV3	AY679147	Brazil	BR74886/02	2002	Genotype3*	Human
	DENV3	I.U.	Brazil	BR3636mosq-2001 ****	2001	I.U.	Aedes aegypti
	DENV3	I.U.	Brazil	BR3354mosq-2001 ****	2001	I.U.	Aedes aegypti
	DENV3	I.U.	Brazil	BR3356mosq-2001 ****	2001	I.U.	Aedes aegypti
	DENV3	I.U.	Brazil	BR81200mosq-2006 ****	2006	I.U.	Aedes aegypti
	DENV3	AY648961.1	Indonesia	Sleman	1978	Genotype1*	I.U.
	DENV3	AY744677.1	French Polinesia	PF89/27643	1989	Genotype1*	Human
	DENV3	AY099336.1	Sri Lanka	IMTSSA-SRI/1266	2000	Genotype3*	Human
	DENV3	NC_001475.2	Sri Lanka	I.U.	2000	I.U.	Human
	DENV3	AY099337.1	Martinique	IMTSSA-MART/1999/1243	1999	Genotype3*	Human
	DENV3	AY676349.1	Thailand	ThD3-1283	1998	Genotype2*	Human
	DENV3	AY676348.1	Thailand	ThD3-1687	1998	Genotype2*	Human
	DENV3	AY676351.1	Thailand	ThD3-0055	1993	Genotype2*	Human
	DENV3	AY676350.1	Thailand	ThD3-0104	1993	Genotype2*	Human
	DENV3	AY676353.1	Thailand	ThD3-0007	1987	Genotype2*	Human
	DENV3	AY676352.1	Thailand	ThD3-0010	1987	Genotype2*	Human
	DENV4	EF457906.1	Malaysia	P75-215	1975	Sylvatic*	Aedes niveus*
	DENV4	AF310152.1	Malaysia	P73-1120	1973	Sylvatic*	Monkey
	DENV4	AY618989.1	Thailand	ThD4-0017	1997	Genotype3*	Human
	DENV4	AY618988.1	Thailand	ThD4-0476	1997	Genotype3*	Human
	DENV4	AY618993.1	Thailand	ThD4-0734	2000	Genotype3*	Human
	DENV4	NC_002640.1	I.U.	I.U.	2000	I.U.	I.U.
	DENV4	AF326573.1	Dominican Republic	814669	1981	Genotype2*	I.U.
	DENV4	AY618991.1	Thailand	ThD4-0087	1977	Genotype1*	Human
	DENV4	AY618992.1	Thailand	ThD4-0485	1995	Genotype1*	Human
	DENV4	AY618990.1	Thailand	ThD4-0348	1991	Genotype1*	Human
	KEDV	NC_012533.1	Senegal	DakAar D1470	I.U.	Mosquito	Human
JAPANESE ENCEPHALITIS VIRUS GROUP	WNV	NC_001563.2	I.U.	956	I.U.	LII**	Human
	WNV	EF429199.1	SouthAfrica	SA381LII	2000	LII**	Human
	WNV	EF429198.1	SouthAfrica	SA93	2001	LII**	Human
	WNV	EF429197.1	SouthAfrica	SPU116	1989	LII**	Human
	WNV	EF429200.1	SouthAfrica	H442	1958	LII**	SouthAfrica
	WNV	NC_009942.1	I.U.	I.U.	1999	LI**	I.U.
	WNV	AF260968.1	Egypt	Eg101	1951	LI**	Human
	WNV	AM404308.1	Portugal	PTRoxo	I.U.	LI**	I.U.
	WNV	AJ965630.2	Portugal	PT6.39	I.U.	LI**	I.U.
	WNV	AJ965629.2	Portugal	PT6.5	I.U.	LI**	I.U.
	WNV	AY262283.1	Kenya	KN3829	1998	LI**	Culex sp
	WNV	AF260969.1	Romania	RO9750	1996	LI**	Culex sp
	WNV	AF317203.1	Russia	VLG	1999	LI**	Human
	WNV	AJ965626.2	Portugal	PT6.16	I.U.	LI**	I.U.
	WNV	AF404757.1	Italy	Italy/1998/equine	1998	LI**	Horse
	WNV	AY268132.1	France	PaAn001	2000	LI**	Horse
	WNV	AY268133.1	Tunisia	PaH001	1997	LI**	Human
	WNV	AF481864.1	Israel	IS98STD1	1998	LI**	Stork
	WNV	AF404755.1	Connecticut99	NY2000grouse3282	2000	LI**	Grouse
	WNV	AF404753.1	UnitedStates	MD2000crow265	2000	LI**	Crow
	WNV	AF206518.2	UnitedStates	Connecticut99	1999	LI**	Culex sp
	KUNV	D00246.1	Australia	KunjinMRM61C	1960	LI**	Culex sp
	KUNV	AY274504.1	Australia	FLSDX clone	I.U.	LI**	I.U.
	JEV	HM596272.1	Malaysia	Muar	1952	Genotype5***	Human
	JEV	AY184212.1	Indonesia	JKT6468	1981	Genotype4***	Mosquito
	JEV	AF221499.1	Taiwan	CH2195LA	1994	Genotype3***	Mosquito
	JEV	AF080251.1	India	P20778	1958	Genotype3***	Human
	JEV	AY585242.1	Korea	K87P39	1987	Genotype3***	Mosquito
	JEV	EF623987.1	India	14178	2001	Genotype3***	Human
	JEV	AF075723.1	India	GP78	1978	Genotype3***	Human
	JEV	EF623989.1	India	04940-4	2002	Genotype3***	Mosquito
	JEV	EF623988.1	India	57434	2005	Genotype3***	Human
	JEV	AF098736.1	Taiwan	TC	I.U.	Genotype3***	I.U.
	JEV	NC_001437.1	Japan	JaOArS982	1982	Genotype3***	Mosquito
	JEV	U47032.1	China	P3	1950	Genotype3***	Mosquito
	JEV	U14163.1	China	SA14	1954	Genotype3***	Mosquito
	JEV	AY508813.1	Japan	JaOH0566	1966	Genotype3***	Human
	JEV	AF098735.1	Taiwan	HVI	1955	Genotype3***	Human
	JEV	GQ918133.2	I.U.	NJ2008	2008	Genotype3***	I.U.
	JEV	AF014161.1	Taiwan	RP-9	1985	Genotype3***	Mosquito
	JEV	AF069076.1	Japan	JaGAr01	1959	Genotype3***	Mosquito
	JEV	AF254452.1	Taiwan	CH1392	1990	Genotype3***	Mosquito
	JEV	AF254453.1	Taiwan	T1P1	1997	Genotype3***	Mosquito
	JEV	EF571853.1	Japan	Nakayama	1935	Genotype3***	Human
	JEV	FJ185036.1	China	B58	1986	Genotype3***	Bat
	JEV	L48961.1	China	Beijing-1	1949	Genotype3***	Human
	JEV	L78128.1	Taiwan	Ling65	1965	Genotype3***	Human
	JEV	AF217620.1	Australia	FU	1995	Genotype2***	Human
	JEV	AF045551.2	Korea	K94P05	1994	Genotype1***	Mosquito
	JEV	AB051292.1	Japan	Ishikawa	1998	Genotype1***	Mosquito
	JEV	AB241119.1	Japan	JEV/sw/Mie/41/2002	2002	Genotype1***	Swine
	JEV	EU880214.1	China	XJ69	2007	Genotype1***	Mosquito
	JEV	GU556217.1	China	JX61	2008	Genotype1***	Pig
	JEV	EU693899.1	China	XJP613	2007	Genotype1***	Mosquito
	JEV	EU429297.1	China	SH17M07	2007	Genotype1***	I.U.
	JEV	FJ495189.1	China	HEN0701	2007	Genotype1***	Swine
	JEV	AB241118.1	Japan	EV/sw/Mie/40/2004	2004	Genotype1***	Swine
	JEV	GU187972.1	China	SC04-17	2009	Genotype1***	Mosquito
	MVEV	NC_000943.1	I.U.	MVE-1-51	I.U.	I.U.	I.U.
	MVEV	JX123032.1	Australia	V11-10	2011	I.U.	Horse
	SLEV	NC_007580.2	United States	Kern217	I.U.	I.U.	I.U.
	SLEV	JQ957869.1	Mexico	Palenque-A770	2008	I.U.	Culex sp
	SLEV	JQ957868.1	Mexico	Palenque-C475	2008	I.U.	Culex sp
	SLEV	DQ525916.1	United States	Kern217	I.U.	I.U.	I.U.
	SLEV	EU566860.1	United States	Hubbard	I.U.	I.U.	Human
	SLEV	FJ753287.2	Argentina	79V-2533	1978	I.U.	Culex sp
	SLEV	FJ753286.2	Argentina	CbaAr-4005	2005	I.U.	Culex sp
	SLEV	JF460774.1	United States	Imperial Valley	2003	I.U.	Culex sp
	SLEV	KF589299.1	Peru	FLU3632	2006	I.U.	Human
	USUV	NC_006551.1	Austria	Vienna 2001	2001	I.U.	dead blackbird
	USUV	JF266698.1	Italy	Italia 2009	2009	I.U.	dead blackbird
	USUV	KC754958.1	C.Af.Rep	ArB1803	1969	I.U.	Culex sp
	USUV	HM569263.1	Italy	Bologna 2009	2009	I.U.	Human
	USUV	KC754954.1	Senegal	ArD19848	1974	I.U.	Culex sp
	USUV	AY453412.1	South Africa	SAAR-1776	I.U.	I.U.	Mosquito
	USUV	KC754955.1	C.Af.Rep	HB81P08	1981	I.U.	Human
	USUV	KC754957.1	Senegal	ArD192495	2007	I.U.	Culex sp
	USUV	KC754956.1	Senegal	ArD101291	1993	I.U.	Culex sp
	USUV	HE599647.1	Germany	BH65/11-02-03	2011	I.U.	Turdus merula
	USUV	JQ219843.1	Austria	Meise H	2002	I.U.	Parus caeruleus
YELLOW FEVER VIRUS GROUP	YFV	X03700.1	I.U.	17D	I.U.	I.U.	I.U.
	YFV	AY640589.1	Ghana	Asibi	1927	West Africa+	Human
	YFV	U54798.1	Coted'Ivore	85-82H	1982	West Africa+	Human
	YFV	U52401.1	Nigeria	69056	1946	West Africa+	Human
	YFV	U52390.1	Brazil	JSS	1935	SouthAmerica+	Human
	YFV	U52420.1	Trinidad	788379	1979	SouthAmerica+	H. spegazzini
	YFV	U52411.1	Peru	B4.1	1981	SouthAmerica+	Human
	YFV	AY968064.1	Angola	Angola71	1971	Angola+	I.U.
	YFV	U52396.1	C.Af.Rep	ArB9005	1977	East-Central Africa+	I.U.
	YFV	AY326415.1	Uganda	MR896	1948	EastAfrica+	I.U.
	SEPV	NC_008719.1	Papua New Guinea	MK7148	I.U.	I.U.	Mosquito
	SEPV	L48981.1	I.U.	MK7148	I.U.	I.U.	I.U.
	SEPV	AY326408.1	I.U.	MK71448	I.U.	I.U.	I.U.
	SEPV	DQ837642.1	Papua New Guinea	MK7148	I.U.	I.U.	I.U.
	WESSV	NC_012735.1	South Africa	SAH177	I.U.	I.U.	I.U.
	WESSV	JN226796.1	South Africa	AV259	1997	I.U.	Human
	WESSV	JN226814.1	South Africa	TAR100	1955	I.U.	Mosquito
	WESSV	JN226819.1	South Africa	AN16210	1989	I.U.	sheep
	WESSV	JN226817.1	South Africa	AR11189	1969	I.U.	Mosquito
	WESSV	JN226815.1	South Africa	AR778	1957	I.U.	Mosquito
	WESSV	JN226812.1	South Africa	SAE118/08	2008	I.U.	Horse
KOKOVERA VIRUS GROUP	KOKV	AY822611.1	I.U.	TS5273	I.U.	I.U.	I.U.
	KOKV	AY822611.1	I.U.	TS5273	I.U.	I.U.	I.U.
	KOKV	L48971.1	I.U.	MK7979	I.U.	I.U.	I.U.
	KOKV	L48970.1	I.U.	OR666	I.U.	I.U.	I.U.
	KOKV	AY632541.4	Autralia	AusMRM 32	I.U.	I.U.	I.U.
	KOKV	NC_009029.2	Autralia	AusMRM 32	I.U.	I.U.	I.U.
	KOKV	L48969.1	I.U.	MRM32	I.U.	I.U.	I.U.
AROA VIRUS GROUP	IGUAV	AY632538.4	I.U.	SPAn 71686	I.U.	I.U.	I.U.
	BSQV	NC_009026.2	I.U.	BeAn 4073	I.U.	I.U.	I.U.
	BSQV	AY632536.4	I.U.	BeAn 4073	I.U.	I.U.	I.U.
SPONDWENI VIRUS GROUP	ZIKV	NC_012532.1	Uganda	MR 766	I.U.	I.U.	Monkey
	ZIKV	KF383072.1	Coted'Ivore	ArA982	1999	I.U.	I.U.
	ZIKV	KF383054.1	Senegal	ArD158084	2001	I.U.	I.U.
	ZIKV	KF268948.1	C.Af.Rep	ARB13565	1976	I.U.	Aedes sp
	ZIKV	KF268949.1	C.Af.Rep	ARB15076	I.U.	I.U.	Aedes sp
	ZIKV	KF383070.1	C.Af.Rep	ArB1362	1968	I.U.	I.U.
	ZIKV	KF383049.1	Senegal	ArD7117	1968	I.U.	I.U.
	ZIKV	KF383059.1	Senegal	ArD142623	2000	I.U.	I.U.
	ZIKV	KF383061.1	Senegal	ArD132915	1998	I.U.	I.U.
	ZIKV	KF383058.1	Senegal	ArD149810	2001	I.U.	I.U.
	ZIKV	KF383082.1	Coted'Ivore	ArA1465	1980	I.U.	I.U.
BAGAZA VIRUS GROUP	NTAV	NC_018705.3	I.U.	IPDIA	1966	I.U.	I.U.
	ROCV	AY632542.4	I.U.	SPH 34675	I.U.	I.U.	I.U.
	BAGV	NC_012534.1	C.Af.Rep	DakAr B209	I.U.	I.U.	Mosquito
	BAGV	HQ644144.1	Spain	Spain B/2010	2010	I.U.	red-legged partridge
	ITV	KC734551.1	Israel	Israel/107458/2010	2010	I.U.	Turkey
	ITV	KC734550.1	Israel	Israel/618/1995	1995	I.U.	Turkey
	ILHV	KC481679.1	Brazil	BrMS-MQ10	2010	I.U.	I.U.
	ILHV	NC_009028.2	I.U.	Original	I.U.	I.U.	I.U.
	TMUV	NC_015843.2	China	JS804	I.U.	I.U.	Goose
	TMUV	JX965381.1	China	Shandong1	2010	I.U.	Duck
	TMUV	KF826767.1	China	TMUV-SDHS	2012	I.U.	Sparrow
	TMUV	KF557893.1	China	lq-1	2012	I.U.	Goose
	TMUV	JF270480.1	China	YY5	2010	I.U.	Duck
	TMUV	KF192951.1	China	HN	2010	I.U.	Duck
	TMUV	KC136210.1	China	Du/CH/LSD/110128	2011	I.U.	Duck
MAMMALIAN TICK BORNE VIRUS GROUP	AHFV	JF416950.1	Saudi Arabia	200201034	2002	I.U.	Human
	AHFV	JF416949.1	Saudi Arabia	200201032	2002	I.U.	Human
	AHFV	JF416952.1	Saudi Arabia	200201036	2002	I.U.	Human
	AHFV	JF416955.1	Saudi Arabia	200307463	2003	I.U.	Human
	AHFV	JF416957.1	Saudi Arabia	Zaki #2	1994	I.U.	Human
	AHFV	JF416962.1	Saudi Arabia	200905926	2009	I.U.	Ornithodoros sp
	AHFV	JF416964.1	Saudi Arabia	200905916	2009	I.U.	Ornithodoros sp
	AHFV	JF416967.1	Saudi Arabia	200905922	2009	I.U.	Ornithodoros sp
	AHFV	JX271892.1	Saudi Arabia	1336	2000	I.U.	Human
	AHFV	JX271893.1	Saudi Arabia	5676	2011	I.U.	Human
	POWV	L06436.1	I.U.	LB	I.U.	I.U.	I.U.
	POWV	HM440560.1	United States	DTVWiA08	2008	I.U.	Ixodes sp
	POWV	HM440563.1	United States	POWANY64	1964	I.U.	ticks on Marmota
	POWV	EU770575	Russia	Spassk-9	1975	I.U.	Dermacentor silvarum
	TBEV	NC_001672.1	I.U.	Neudoerfl	I.U.	I.U.	Ixodes sp
	TBEV	U27491.1	I.U.	263	I.U.	I.U.	Ixodes sp
	TBEV	U27494.1	I.U.	Ljubljana I	I.U.	I.U.	I.U.
	TBEV	U39292.1	I.U.	Hypr	I.U.	I.U.	I.U.
	TBEV	AF069066.1	I.U.	Vasilchenko	I.U.	I.U.	I.U.
	TBEV	U27492.1	I.U.	Aina	I.U.	I.U.	Ixodes sp
	TBEV	U27490.1	I.U.	132	I.U.	I.U.	Ixodes sp
	TBEV	U27496.1	I.U.	RK1424	I.U.	I.U.	Ixodes sp
	TBEV	U27493.1	I.U.	Crimea	I.U.	I.U.	Ixodes sp
	LAGTV	AF253419.1	I.U.	TP21	I.U.	I.U.	I.U.
	LAGTV	EU790644.1	Malaysia	TP21	I.U.	I.U.	Ixodes sp
	LIV	NC_001809.1	I.U.	369/T2	I.U.	I.U.	I.U.
	LIV	KF056331.1	England	Penrith	2009	I.U.	Ovis aries
	GGEV	DQ235153	Greece	I.U.	I.U.	I.U.	I.U.
	TSEV	DQ235151	Turkey	I.U.	I.U.	I.U.	I.U.
	SSEV	DQ235152	Spain	I.U.	I.U.	I.U.	I.U.
	OHFV	NC_005062.1	I.U.	Bogoluvovska	I.U.	I.U.	I.U.
	GGYV	DQ235145	I.U.	Australia	I.U.	I.U.	I.U.
SEABIRD TICK BORNE VIRUS GROUP	KADV	DQ235146	Uganda	I.U.	I.U.	I.U.	I.U.
	SREV	DQ235150	Australia	I.U.	I.U.	I.U.	I.U.
	MEAV	DQ235144	France	I.U.	I.U.	I.U.	I.U.
	TYUV	DQ235148	United States	Three Arch Rock Island	I.U.	I.U.	I.U.
NON KNOW VECTOR VIRUS GROUP	YOKV	NC_005039	Japan	Oita 36	I.U.	I.U.	bat
	ENTV	NC_008718	Uganda	UgIL-30	I.U.	I.U.	bat
	APOIV	NC_003676	I.U.	ApMAR	I.U.	Old World Rodent++	I.U.
	MMLV	NC_004119.1	United States	I.U.	I.U.	Bat ++	I.U.
	RBV	JQ582840	United States	M64	1956	Bat ++	I.U.
	MODV	AJ242984	United States	M544	I.U.	New World Rodent++	I.U.
MOSQUITO ONLY VIRUS GROUP	CxV	FJ663034.1	United States	Iowa07	2007	I.U.	Culex sp
	CxV	EU879060.1	Mexico	CxFV-Mex07	2007	I.U.	Culex sp
	CxV	HQ678513.1	China	H0901	2009	I.U.	Culex sp
	CxV	JQ308190.1	China	DG1007	2010	I.U.	Culex sp
	CxV	AB701776.1	Japan	Toyama2627	2008	I.U.	Culex sp
	CxV	FJ502995.1	United States	HOU24518	2008	I.U.	Culex sp
	CxV	AB701775.1	Japan	Toyama1431	2006	I.U.	Culex sp
	CxV	AB701772.1	Japan	Toyama740	2005	I.U.	Culex sp
	CFAV	NC_001564.1	I.U.	I.U.	I.U.	I.U.	Aedes sp
	KRV	NC_005064.1	I.U.	SR-82	I.U.	I.U.	I.U.
	KRV	AY149904	I.U.	SR-75	I.U.	I.U.	I.U.
	AEFV	NC_012932.1	Japan	Narita-21	2003	I.U.	Aedes sp
	AEFV	KC181923.1	United States	SPFLD-MO-2011-MP6	2011	I.U.	Aedes sp
Table S1. Flavivirus nucleotide sequences used in this study. A table with the GenBank ID and additional information is presented ordered according to each taxonomic group. In bold face are indicated the sequences used as references for RNA structure predictions and models of 3’UTRs. I.U. Information Unavailable. * Genotype specific information was obtained from the following reports: Vasilakis N…

## Sheet: Hoja5
Human	West Africa
Human	West Africa
Human	West Africa
Human	SouthAmerica
H. spegazzini	SouthAmerica
Human	SouthAmerica
IU	Angola
IU	East-Central Africa
IU	EastAfrica
